# Supplementary material
Source: publisher site journal article supplement (https://www.dovepress.com/article/493185)
Supplement: Supplementary file 1 [file get_supplementary_file.php]

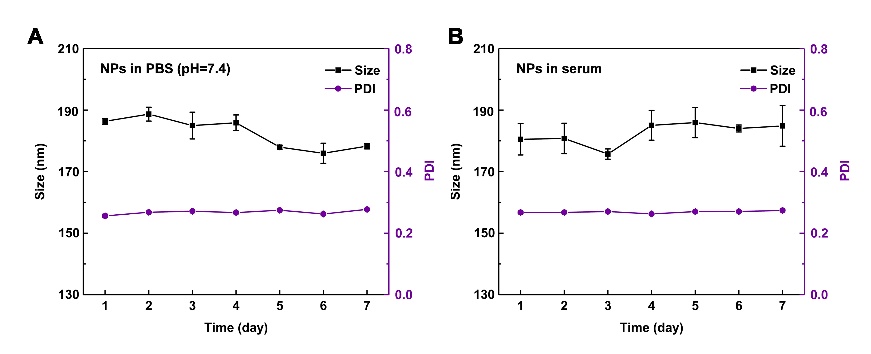


**Figure S1.** Changes in size and PDI of BA@ZIF(Mn)/FA-PEG nanoparticles over a 7-Day storage period in PBS (A), and serum (B).


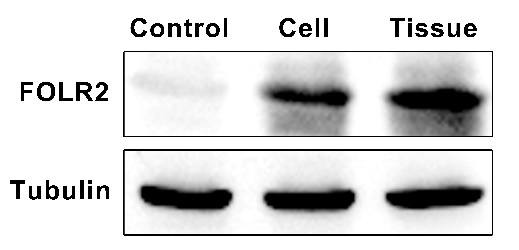


**Figure S2.** Validation of β-folate receptor as a target for BA@ZIF(Mn)/FA-PEG nanoparticles via western blot.
